# Supplementary material
Source: PubMed Central journal article supplement (PMC4995904)
Supplement: IAI.00361-16_zii999091812so1.pdf [file IAI.00361-16_zii999091812so1.pdf]

## Supplemental Material

**Movie S1. *B. pseudomallei* is located within spinal cord tissue.** Rotation of a three-dimensional reconstruction of confocal stack showing *B. pseudomallei* (green) within the spinal cord; z-projected image is shown in Fig. 2J.
